1 **TITLE:** Mobilisation towards formal employment in the healthcare system: A qualitative  
2 study of community health workers in South Africa

3

4

5 **Authors:** Hlologelo Malatji<sup>1\*</sup>, Frances Griffiths<sup>1,2</sup>, Jane Goudge<sup>1</sup>

6

### 7 **Affiliations**

8 <sup>1</sup> Centre for Health Policy, School of Public Health, University of the Witwatersrand, South  
9 Africa

10 <sup>2</sup> Division of Health Sciences, Warwick Medical School, University of Warwick, Coventry,  
11 United Kingdom

12

13 \*Corresponding author

14 [Hlologelo.Malatji@wits.ac.za](mailto:Hlologelo.Malatji@wits.ac.za)

15

16

### 17 **ABSTRACT**

18 In low and middle-income countries (LMICs), community health workers (CHWs) play a  
19 critical role in delivering primary health care (PHC) services to vulnerable populations. In  
20 these settings, they often receive low stipends, function with a lack of basic resources and  
21 have little bargaining power with which to demand better working conditions. In this article,  
22 we examine CHWs' employment status, their struggle for recognition as health workers, and  
23 their activities to establish labour representation in South Africa. Using a case study  
24 approach, we studied seven CHW teams located in semi-urban and rural areas of Gauteng  
25 and Mpumalanga Provinces, South Africa. We used in-depth interviews, focus group

**NOTE:** This preprint reports new research that has not been certified by peer review and should not be used to guide clinical practice.

26 discussions and observations to gather data from CHWs and their representatives, supervisors  
27 and PHC facility staff members. The rural and semi-urban sites CHWs were poorly  
28 supervised, resourced and received meagre remuneration, their employment outsourced,  
29 without employment benefits and protection. The lack of career progression opportunities  
30 demotivated the CHWs, particularly those keen to establish a career in health. In the semi-  
31 urban sites, CHWs established a task team to represent them that held regular meetings and  
32 often used violent and disruptive strategies against clinic, district and provincial management,  
33 which often led to tensions and conflicts with facility staff and programme coordinators.  
34 After a meeting with the local provincial legislature, the task team joined a labour union  
35 (NEHAWU) in order to be able to participate in the local Bargaining Council. Though they  
36 were not successful in getting the government to provide permanent employment, the union  
37 negotiated an increase in stipend from R2 500 (136 USD) to R3 500 (192 USD). In contrast,  
38 in the rural sites, the CHWs were not actively demanding permanent employment due to their  
39 employment contracts being partly managed by non-government organisations (NGOs); they  
40 were fearful of being recalled from the government programme. After the study ended,  
41 during the height of COVID-19 in 2020, when the need for motivated and effective CHWs  
42 became much more obvious to decision makers, the semi-urban-based teams received  
43 permanent employment with remuneration between R9-11,000 (500-600 USD). The task  
44 team and their protests raised awareness of the plight of the CHWs, and joining a formal  
45 union enabled them to negotiate a modest salary increase. However, it was the emergency  
46 created by the world-wide COVID-19 pandemic that forced decision-makers to acknowledge  
47 their reliance on this community-based cadre. Hopefully this recognition, and the associated  
48 gains, will not fade as the pandemic recedes.

49

50 **Key words:** community health workers, employment, labour representation, union, South  
51 Africa

52

## 53 **INTRODUCTION**

54 In pursuit of universal health coverage (UHC), low and middle-income countries (LMICs)  
55 are investing in programmes to extend primary health care services (PHC) to marginalised  
56 communities [1]. Community health worker (CHW) programmes are being revitalised to  
57 extend the delivery of the PHC services to marginalised communities and strengthen the  
58 provision of community-based health services [2]. Systematic reviews have shown CHWs are  
59 able to extend access to PHC services by supporting chronic care management, antenatal and  
60 postnatal support programmes, and early identification of malnourished children [2-4].

61 However, in some settings the programmes fail to deliver on expectations due to limited  
62 access to resources (e.g. blood pressure and glucose monitoring machines), low and  
63 sometimes irregular remuneration and poor integration into the healthcare system resulting in  
64 poor relationships with facility-based staff members [3, 5, 6]. CHW are mostly women, often  
65 with low levels of education, who are expected to work on voluntary basis, or who are  
66 underpaid with no permanent employment security [7]. These employment conditions  
67 contribute to CHWs' low work morale, demotivation and high work turnover [1, 8]. Pandya  
68 et al. argues the provision of incentives, both monetary and non-monetary is crucial to  
69 improve CHW motivation, job satisfaction, and performance, which, in turn, improves  
70 retention [7]. Monetary incentives include stable salaries, while non-monetary incentives  
71 include the provision of working tools such as uniforms and raincoats.

72 While the World Health Organisation (WHO) has argued for the optimisation of CHW  
73 programmes through fair remuneration schemes and provision of career development  
74 pathways, as well as integration into the health system and provision of resources [6], there

75 has been little progress. Unionisation among the CHWs is often low due to CHWs working in  
76 isolation or in pairs, with little bargaining power with which to demand better working  
77 conditions [15, 20].

78 In South Africa labour unions have played a key role in the country's history in opposing  
79 Apartheid; the white minority government had enacted labour laws based on race  
80 categorisation thus resulting in unfair labour practices [9]. In the 1990s, the Congress of  
81 South African Trade Unions (COSATU), an umbrella body of unions, formed an alliance  
82 with the governing political party – the African National Congress. As a result, unions  
83 participated in government policy discussions, and influenced labour legislation  
84 strengthening employees' rights in workplace. Public sector unions' alliance with  
85 government enabled the formally employed workers to consistently obtain above inflation  
86 salary increases through centralised bargaining, although union leaders are often criticized for  
87 using the alliance to build their own political connections, rather than representing the  
88 concerns of ordinary workers [10, 11].

89  
90 In line with international UHC goals, in 2011, the South African Department of Health  
91 (DOH) has attempted to strengthen the delivery of PHC services [12]. A nation-wide CHW  
92 programme (locally known as ward-based outreach teams; WBOT) was introduced. The  
93 programme intention was for each WBOT, linked to a local PHC facility, to comprise of 6  
94 CHWs who serve a defined geographic area, provide a combination of promotive and  
95 preventative healthcare services to households, and make referrals to social services workers.  
96 The team was to be led by a nurse and supported by a health promoter and an environmental  
97 officer.

98 Prior to the introduction of the WBOTs, the CHWs were in the employment of non-  
99 government organisations (NGOs), mainly providing HIV/AIDS and TB related services at

100 community level [13]. The NGO programmes were fragmented and single disease-focused,  
101 thus neglecting the other needs of individuals and families. The WBOTs replaced the NGO-  
102 led programmes and absorbed the CHWs on a 12-month renewable contract earning a  
103 monthly stipend of R2 500 (136 USD) (at the time of study), their employment was  
104 outsourced to either NGOs or payroll administration company. As a result, despite their  
105 employment within a nationwide CHW programme, the CHWs had little employment  
106 security and were paid a meagre stipend. With high levels of union activity being common in  
107 South Africa, informal groupings of CHW have been protesting for several years, demanding  
108 better working conditions [19, 20, 26]. In this article, we examine CHWs' employment status  
109 and their mobilisation for formalisation in the healthcare system.

110

## 111 **METHODS**

### 112 **Study design**

113 The data originate from a large project and a doctoral study that investigated the design and  
114 implementation of CHW programmes in South Africa. The larger project included the  
115 introduction of a nurse mentor intervention with a specific focus on building CHWs  
116 knowledge and skills, supporting their integration into healthcare systems and community  
117 structures. Together, the two studies adopted a qualitative approach with 7 case studies (each  
118 case study being a team of CHWs).

119

### 120 **Study setting**

121 The research was carried out in Sedibeng, Johannesburg and Tshwane health districts of  
122 Gauteng Province and Ehlanzeni health district of Mpumalanga Province. The two provinces  
123 were selected based on their location (urban vs rural), history and contrasting models of

124 implementing the CHW programmes. The CHW programmes in the three districts of  
125 Gauteng province were implemented by the Provincial Department of Health with a payroll  
126 administration company contracted to pay the CHWs on behalf of the department. The  
127 Mpumalanga province, where the rural case studies were located, had not fully implemented  
128 the national CHW programme. Here, the Provincial Department of Health funded existing  
129 local NGOs, that provided home-based care services, to deploy some of its carers to  
130 constitute the CHW programme in local health facilities. The NGOs remained the primary  
131 employer of the CHWs, while supervision and resources were being provided by the health  
132 facilities.

133

#### 134 **Data collection**

135 The data was collected by the first author and a group of data collectors from 2016 to 2019.  
136 The first author was a South African Research Chairs Initiative (SARChI) doctoral researcher  
137 employed by a research centre undertaking health policy and systems research. The data  
138 collectors were qualified qualitative researchers sensitised to the type of activities CHWs  
139 undertake. Individual interviews, focus group discussions and observations were used to  
140 collect data from the different CHW teams in the two provinces. The research instruments  
141 were all in English, during interviews the data collectors translated the interview questions to  
142 local languages (i.e. IsiZulu, Sesotho and Sepulana) for participants who could not  
143 understand the English language. To ensure the consistency of the translations, data collectors  
144 participated in role-plays to practice posing the same question in the different languages prior  
145 to field work.

146

147

148

149 *Focus group discussions*

150 Nine focus group discussions (FGDs) were held in the different sites, and each FGD had  
 151 approximately 10 participants, all women (Table 1). All CHWs who formed part of the CHW  
 152 team in the health facilities were invited to participate in FGDs, and there were no reported  
 153 refusals. We used a structured guide to ask the CHWs about their working conditions, daily  
 154 activities, resources they require to perform their duties and their engagement with the facility  
 155 and Department of Health. Each of the discussions were audio-recorded and lasted  
 156 approximately 2 hours. The first author facilitated the discussions while the data collectors  
 157 took notes. The notes were typed by the data collectors and formed part of the dataset for  
 158 analysis.

159 **Table 1: data collection methods and number of participants**

|                                                           | Sedibeng     |        | JHB    | Tshwane |        | Ehlanzeni |        | Total |
|-----------------------------------------------------------|--------------|--------|--------|---------|--------|-----------|--------|-------|
|                                                           | Team 1       | Team 2 | Team 3 | Team 4  | Team 5 | Team 6    | Team 7 |       |
| Focus group discussions with CHWs                         | 1            | 1      | 2      | 2       | 2      | 1         | 1      | 9     |
| Interviews with CHW teams                                 | 4            | 4      | 3      | 2       | 1      | 1         | 2      | 17    |
| Interviews with nurse mentor                              | 4            |        | -      | -       |        | -         |        | 4     |
| Interviews with task team members/<br>CHW representatives | 6            |        | -      | -       | -      | -         | -      | 6     |
| Interviews with key informants                            | 5            |        | 2      | 6       |        | 3         |        | 16    |
| Observations of task team meetings                        | 6 (meetings) |        | -      | -       |        | -         |        | 6     |

160

161 *Interviews*

162 We purposively selected and interviewed CHWs and their supervisors, facility staff members,  
 163 nurse mentor and programme coordinators at district level. We asked them about the CHW  
 164 programme (i.e. CHWs duties in households, resources, access to supervision, and conditions  
 165 of employment). Furthermore, in Sedibeng district where we spent prolonged time in the  
 166 field, we interviewed CHWs who represented their colleagues at district level meetings and  
 167 when there were conflicts. The CHW representatives were referred to as a task team. We

168 asked them about the origin of the task team, engagement with health facilities, district and  
169 province, and successes and challenges in advocating for CHWs rights. Each interview lasted  
170 approximately 45 minutes and were audio-recorded with participant consent.

### 171 Observations

172 These were conducted in order to understand the CHW activities relating to labour  
173 mobilisation aimed at challenging the employer to provide better conditions of employment.  
174 We observed 6 CHW representatives meetings with the general CHW population, programme  
175 coordinators and the payroll administration company (Table 1). In these meetings, we  
176 documented the issues being discussed and resolutions made.

### 177 **Data analysis**

178 As described by Braun [14], we used thematic content analysis method to analyse the data.  
179 The team read through the interview transcripts and meeting notes and developed a  
180 codebook. Codes captured information about CHW resources requirement (e.g., what they  
181 have and do not have) and activism to challenge the government to provide permanent  
182 employment. The research team held regular meetings to discuss the coded data and  
183 emerging themes. We undertook comparative analysis between the different cases of context,  
184 processes and outcomes of mobilisation.

### 185 **Ethics approval and participant consent**

186 The larger project was cleared by the University of the Witwatersrand HREC Medical  
187 Committee (M160354) and the Sedibeng health district. The doctoral study received ethical  
188 clearance (M180540) from the same university ethics body, and the Johannesburg, Tshwane  
189 and Ehlanzeni provincial government research authorities. The participants provided written  
190 informed consent before participation in interviews and focus groups. Before observing CHW  
191 in the field and their representative meetings with district management, we checked with



192 those present for verbal consent. We explained there would be no audio-recording made; the  
193 researcher will write notes of the deliberations. There were no reported refusals in the study.

194

## 195 **FINDINGS**

196 The CHWs conditions of employment and mobilisation to challenge government to provide  
197 permanent employment and resources is presented in two sections. The first section focuses  
198 on CHWs conditions of employment (i.e. stipend, employment security, career advancement  
199 opportunities, work tools and access to supervision), and how these conditions hindered the  
200 effectiveness of the CHWs in the different sites. The second part considers CHW labour  
201 mobilisation towards permanent employment.

202

### 203 **CHW conditions of employment**

#### 204 *Stipend*

205 Across the sites, the CHWs said that the low stipend was insufficient and demotivating:

206 “...*the government should hear us and increase our stipend, so when we go to the community*  
207 *to motivate and counsel people, they understand us. We cannot talk to people who are*  
208 *frustrated and hungry when ourselves are also frustrated and hungry.*” (CHW, FGD 1,

209 Tshwane District Team 2). The CHWs felt undervalued: “*We become de-motivated because*  
210 *of the stipend. Our stipend is too little, and you see the amount of work that we do. We get*

211 *burned by the sun*” (CHW, FGD, Tshwane District Team 2). The CHWs provided services to

212 patients located in informal settlements, hostels and remote areas. Some of the areas,

213 particularly the hostels and informal settlements were unsafe due to high crime rates.

214 In the urban sites, the department contracted a payroll administration company to pay the

215 CHWs (Table 2). The company issued a bank card that the CHWs used to access their

216 stipend, however, the card did not have features of a traditional bank card (e.g., cash deposit

217 and transfer options); it was only for the purpose of receiving and withdrawing the stipend.

218 The company offices were located far from the reach of many CHWs, who lived and worked

219 in the periphery of the districts, making it difficult to resolve any problems with the card or

220 the stipend.

221

222 In the rural sites, where the programme was managed by local NGOs, the CHWs regularly

223 received the stipend late, and would continue working for up to 6 months without being paid:

224 *“Normally we are getting paid after 3 or 6 months so now we might get paid in October/*

225 *November. This is disturbing us. We are always in debt and when we get that amount even if*

226 *it is back pay it all goes to the creditors”* (CHW, FGD, Ehlanzeni District Team 2). The sub-

227 district officials were aware of the delayed payment of CHW stipend and expressed how it is

228 important for the CHWs to be formal employees of the department, so they can be paid on

229 time: *“The CHWs receive their stipends from the home-based care organizations (NGOs).*

230 *The minister mentioned that the CHWs should be part of the department and have PERSAL*

231 *numbers but due to the current [budget] constraints, I don’t see this happening soon.”*

232 (Government official, Interview, Ehlanzeni District). The official blamed the NGOs as they

233 always submit paperwork required by the department late for timely processing and release of

234 funds.

### 235 Employment security

236 The urban-based teams had to renew their contracts with the payroll administration company

237 every year, and this created anxiety among the CHWs: *“What if they wake up and say that*

238 *they are not renewing our contracts? What are we going to do? We have children and*

239 *families, the children are waiting on us as their moms to bring them something”* (CHW,

240 FGD, Johannesburg District). The CHWs also felt the company, as contractor to the

241 department, was disinterested in their call for permanent employment: *“I can tell you that*  
242 *payroll administration company doesn’t care about us. If our task team says that it has a*  
243 *meeting, the [payroll company] does not understand or give us the go ahead to attend the*  
244 *meeting. We have to struggle to go to that meeting.”* (CHW, FGD, Sedibeng District Team 1).

245 The CHW in rural sites were anxious about their contractual arrangement with the NGOs, as  
246 their employment was decided by the NGO managers. During our discussions, they seemed  
247 unable to openly discuss their employment concerns, as they feared being recalled from the  
248 government programme (where there was a possibility of permanent employment) by the  
249 NGO managers. These concerns often emerged after audio-recording had stopped.

#### 250 Career advancement opportunities

251 Some CHWs were frustrated by the lack of career progression in the field, as they wanted to  
252 establish a career in health care (e.g., to be trained as a nurse). The Johannesburg team had  
253 young CHWs with matric qualifications who were interested in furthering their studies. They  
254 felt the Department of Health was not making opportunities available for them: *“In our team,*  
255 *there are people with mathematics and physical science; why can’t they take these people so*  
256 *that they could study for something like nursing, pharmacy and so forth? They can see that*  
257 *we love what we are doing. Not all of us have the money to go to private institutions to study.*  
258 *The government is failing us”* (CHW, FGD, Johannesburg District). One of the CHWs was  
259 already studying towards a teaching qualification at a local university. This was not true for  
260 the other sites, where the majority of the CHWs did not possess a matric pass, which is a  
261 prerequisite to enrol for tertiary education. However, there was still a desire among the  
262 CHWs to be trained and promoted into better positions with benefits: *“We complete trainings.*  
263 *At least when you have done the training, they should promote you but now we remain the*  
264 *same.”* (CHW, FGD, Johannesburg). A representative of the CHWs in Sedibeng was  
265 concerned that the Department of Health provides short training courses but never considers

266 them for promotion after the training: *“After some of them finished and got their certificates;*  
267 *they are still doing the same work, same level, same stipend. So that is our biggest challenge.*  
268 *Why are there trainings that don’t have opportunities?”* (CHW representative, Interview 1,  
269 Sedibeng District).

### 270 Work tools

271 When undertaking household visits, CHWs require resources such as blood pressure and  
272 glucose monitoring machines, stationary and a raincoat etc. Across the different sites, the  
273 majority of the CHWs did not have these resources. At the inception of the programme, the  
274 employer made provisions for the CHWs to have these resources, although some teams did  
275 not receive them: *“We only saw the boxes. One sister from clinic X did ask us how come we*  
276 *don’t have BP machines. We said we don’t know. Then the sister asked the sister in-charge*  
277 *and she promised to get us BP machines. We got 2 machines and we had to share them but*  
278 *now there are no batteries.”* (CHW, FGD, Ehlanzeni District Team 2).

279 The lack of equipment affected the CHW activities in the households: *“Some patients expect*  
280 *us to check their blood pressure and sugar level when we visit them. If I don’t have the*  
281 *machines, they ask what the use of me visiting them?”* (CHW, FGD, Ehlanzeni 6). Another  
282 CHW commented: *“The patients keep on asking us to measure their BP and blood sugar...*  
283 *we always tell them that we don’t have equipment. That makes people to undermine us; they*  
284 *say we are useless.”* (CHW, FGD, Johannesburg District).

285 A facility manager in Tshwane was aware the CHWs needed resources, however, he felt  
286 helpless: *“They received backpacks, but they did not have all the equipment. The CHWs are*  
287 *supposed to have blood sugar machines but they don’t have them. If the clinic were to*  
288 *distribute the glucose strips to all the CHWs, the clinic will be left with none and that*

289 *wouldn't be good because they are very costly.*" (Facility Manager, Interview, Tshwane  
290 District Team 4).

291

292 Space within the health facilities was an issue in both urban and rural sites. The CHWs in  
293 Johannesburg did not have a dedicated space to use to meet, discuss work and store patient  
294 records. A CHW commented: "... *sometimes we find that our things are missing or when you*  
295 *check your stuff you will find your things rearranged as if someone was looking for*  
296 *something, and you cannot ask anyone about it.*" (CHW, FGD, Johannesburg District). The  
297 CHWs also bemoaned the lack of privacy while participating in capacity building workshops:  
298 "...*we write pre-tests and post-tests weekly. When we write the tests, we need a quiet space to*  
299 *concentrate, but there will be facility staff members going back and forth while we are*  
300 *writing the test. While we were sitting here, another person would use the microwave.*"

301 (CHW, FGD, Johannesburg District). In the rural sites, the CHWs did not have workspace in  
302 the main facility, instead they were accommodated in other buildings, which limited  
303 interactions and collaboration with facility-based staff. However, teams with senior  
304 supervisors often had access to suitable spaces within the facility, as their supervisors were  
305 able to negotiate for them to use the spaces without being interrupted.

### 306 Uniforms

307 The CHWs felt obliged to purchase work uniforms, as they wanted the community to  
308 recognise them as members of the health facility. To achieve this end, they saved a portion of  
309 their stipend to buy a uniform. A CHW commented: "*I also think that the money is little*  
310 *because they still expect us to be presentable when we go to the households. We buy*  
311 *everything that we wear; they don't offer us anything like a t-shirt for work – nothing*"  
312 (CHW, FGD, Tshwane District Team 2). The CHWs felt if they visited the households  
313 dressed in private clothes, they will struggle to gain the trust and acceptance of the

314 community. *“It is a must because you have to be presentable to the patients in the*  
315 *community, you cannot go to the community wearing a grey shirt, they will think you are a*  
316 *thief”* (CHW, FGD, Johannesburg).

317 A facility manager in Tshwane agreed with the CHWs, that a uniform plays a critical role in  
318 ensuring the CHWs are recognised as members of the local health facility: *“When someone*  
319 *looks presentable, they gain peoples’ trust and attention easily. As long as the CHWs don’t*  
320 *have uniforms, name tags and continue receiving low stipends, the community will not take*  
321 *them seriously”* (Facility Manager, Interview, Tshwane District Team 4).

### 322 Relationship with facility-based staff members

323 Across the different sites, the CHWs reported complex relationships with their supervisors,  
324 facility-based staff members and programme coordinators. Due to their low status in the  
325 health system, the CHWs felt neither appreciated nor respected by facility-based staff: *“They*  
326 *disrespect and undermine us but we do respect them, not that we are scared of them.”* (CHW,  
327 FGD, Johannesburg). The CHW reported that in other facilities some CHWs who felt  
328 disrespected by facility staff resorted to physically fighting as a way of asserting themselves  
329 (CHW, FGD, Johannesburg District). Despite poor relationships, the CHWs continued to  
330 assist the facilities in their daily functions. We observed the Sedibeng teams delivering long-  
331 term medications to the elderly, while other teams undertook contact tracing, particularly  
332 those defaulting on their long-term medications and made referrals to the facility. However,  
333 the CHWs felt facility staff delayed attending to patients the CHW had referred to the facility,  
334 and this affected their ability to bring uncooperative patients for care. These issues were  
335 better managed in facilities where a senior supervisor was present. In Sedibeng, the senior  
336 supervisor negotiated with facility-staff to support the CHWs with timely attendance to  
337 referred cases. This arrangement motivated the CHWs and built their work morale.

338 A facility manager in a Tshwane facility argued there is a need to integrate the programmes  
339 into facilities: “*They introduced WBOT as a program as if it is independent from the clinic*  
340 *hence there isn’t unity between WBOT and facility staff. Even worse they employed managers*  
341 *for WBOT, this implies the facility and WBOT are two different entities. So, when they go to*  
342 *the facility manager to ask for medication, the facility refuses and says that they are finishing*  
343 *their stock*” (Facility Manager, Interview, Tshwane District Team 4).

#### 344 Supervision

345 There were visible differences in how supervision was provided at the different sites. In the  
346 urban sites, every morning before going into the community, the supervisor provided the  
347 CHWs with in-service training focusing on the cases they attended to the previous day and  
348 accompanied them on household visits to provide support. In the rural sites, CHWs were  
349 managed by senior supervisors, but there was no morning meeting before going into the  
350 community, and they operated without community supervision as their supervisors were not  
351 able to go to the field with them, mainly due to the lack of transport.

352 Infrequent supervision was a concern for the CHW representatives. In Sedibeng, the CHW  
353 representatives complained that the supervisors were not investing sufficient time in  
354 attending to the needs of the CHWs, instead spent most of their time in the facilities: “*When*  
355 *they get in the clinic, they do clinical work, like children’s immunizations, family planning, or*  
356 *whatever. They don’t support the CHW programme, you understand? It is the challenge that*  
357 *we have, and you find out that when the CHWs are supposed to tell the [CHW*  
358 *representatives] about this, it causes conflict with the supervisors*” (CHW Representative,  
359 Interview 2, Sedibeng District). The representatives were unhappy that supervisors worked in  
360 the facility while they were employed to oversee CHWs activities in the community. The  
361 Department of Health, which is the employer of the supervisors, expect all CHW supervisors

362 to spend 70% of their time in the community, 30% in facilities mainly performing  
363 administrative duties related to their functions.

#### 364 **CHW labour mobilisation**

##### 365 *Emergence of CHW representation*

366 Prior to joining the nation-wide CHW programme in 2011, the CHWs worked for NGOs  
367 providing home-based care services (Table 2). While in the NGOs, the CHWs established a  
368 committee to challenge the exploitation perpetuated by the organisations' management. After  
369 joining the national programme, representatives of the CHWs were elected to what became  
370 known as the task team. The task team is made up of CHWs, lay counsellors and health  
371 promoters working in different facilities within the district. These CHW representatives  
372 decided not to become members of established labour unions, as existing unions were  
373 perceived as ineffective and with history of siding with management. A member of the task  
374 team commented: "*We have tried to be under a labour union, but whenever they left to go to*  
375 *the negotiations, they did not take us. They don't even take one of us to be a part of it, even if*  
376 *the person is just an observer*" (CHW representative, Interview 1, Sedibeng District).

377 Another member added: "*The union that we will agree to be under will be a union that we*  
378 *will be a part of. Whenever they go and negotiate for us, or whatever, we must be included*  
379 *and we must be a part of that negotiation*" (CHW representative, Interview 1, Sedibeng  
380 District).

381

382 The task team in Sedibeng ensured each of the 4 subdistricts of Sedibeng had a  
383 representative: "*We have divided ourselves according to clinics; let us say he/she works at*  
384 *facility X. He/she is the one who is responsible for the clinics in closer to her facility. I will*  
385 *also be responsible for facilities closer to where I work. We divide ourselves like that*" (CHW



386 representative, Interview 2, Sedibeng District). Donations from the CHWs funded the travel  
 387 costs so the task team members could undertake their activities at the different facilities.

388 **Table 2: Description of CHW programmes and labour representation**

|                                        | Sedibeng (semi-urban)                                                                                                                                                                                                                            | Johannesburg (semi-urban)               | Tshwane (semi-urban)                    | Ehlanzeni (rural)                                                    |
|----------------------------------------|--------------------------------------------------------------------------------------------------------------------------------------------------------------------------------------------------------------------------------------------------|-----------------------------------------|-----------------------------------------|----------------------------------------------------------------------|
| <b>Programme management</b>            | Government                                                                                                                                                                                                                                       |                                         |                                         | Government; contracted to local NGOs                                 |
| <b>Salaries disbursement</b>           | Paid by a payroll administration company contracted by the government                                                                                                                                                                            |                                         |                                         | Paid by NGOs contracted by government; delays in disbursing salaries |
| <b>Member of union/ advocacy group</b> | Yes; prior to joining a formal labour union CHWs were represented by a task team                                                                                                                                                                 | Yes                                     | Yes                                     | No                                                                   |
| <b>Labour mobilisation activities</b>  | <ul style="list-style-type: none"> <li>Regular protests to demand permanent employment</li> <li>Facility stay aways</li> </ul>                                                                                                                   | Protests to demand permanent employment | Protests to demand permanent employment | None                                                                 |
| <b>Outcomes of mobilisation</b>        | <ul style="list-style-type: none"> <li>Monthly stipend increased</li> <li>Payroll administration company contract not renewed</li> <li>In Sedibeng, the task team negotiated with facilities to attend to CHWs needs (e.g. resources)</li> </ul> |                                         |                                         | Monthly stipend increased                                            |

389  
 390 In Tshwane and Johannesburg districts, there were emerging groups of CHWs who advocated  
 391 for the rights of the CHWs. In the rural sites, where the programme was under the  
 392 management of NGOs, CHWs did not have formal representation; researcher and data  
 393 collector observations revealed that the CHWs seemed fearful of being outspoken about the  
 394 need to have a labour union to represent them.

395 *Negotiating for decent work*

396 Since 2015, the CHW leaders have led multiple strikes and stay aways in Gauteng province.  
 397 One strike was triggered by the appointment of the payroll administration company without  
 398 consulting the CHWs. The protest was directed at the National Department of Health. A  
 399 member of the task team commented: “*We had a strike and spent about 3 days sleeping*  
 400 *there. We came back and went back again to fight and spill rubbish in the offices, but*  
 401 *unfortunately, we fought without any luck*” (CHW representative, Interview 2, Sedibeng

402 District). The CHWs were concerned that the department was able to award a multi-million  
403 contract but never considered their demands for permanent employment with better pay: “*We*  
404 *wanted to understand why we were tendered without our consent? The department needs our*  
405 *services; why is it outsourcing us when it has money for tenders? That was our concern.*”  
406 (CHW representative, Interview 2, Sedibeng District).

407

408 The Sedibeng task team leaders were arrested after embarking on this violent, unprotected  
409 strike<sup>1</sup>. The task team encouraged the CHWs to withdraw their services and to protest in  
410 support of their leaders at the court as their case was being heard. Some CHWs were not keen  
411 to participate, as it meant leaving their workplace and neglecting patients. Some CHWs who  
412 chose not to participate were threatened with violence. A facility staff member commented:  
413 “*They all donated a R10 for transport for those who will go on strike and support the task*  
414 *team. The CHWs who want to work were receiving threats that they will come for them*”  
415 (Nurse Mentor, Interview 3, Sedibeng District). Following release of the task team from jail,  
416 the CHWs were ordered to withdraw their services in celebration. A facility staff member  
417 commented: “*On Wednesday 23th, CHW’s didn’t come to work because they were told by*  
418 *task team to go on a 3 day holiday to celebrate their struggle and past imprisonment of their*  
419 *two task team leaders. There were no formal notification of this holiday and all WBOT*  
420 *leaders, including supervisors didn’t know except [district management]”* (Nurse Mentor,  
421 Interview 2, Sedibeng District).

422

423 After the unprotected strike action, the task team members continued efforts to improve  
424 conditions and access to resources. Within the health facilities, the representatives focused on

---

<sup>1</sup> Non-procedural, or unprotected strike, is one where the strikers have not complied with the requirements of the South African Labour Relations Act of 1995 before going on strike. This removes the employer's opportunity to develop contingency plans for running the business during the strike.

425 addressing CHW conflicts with facility staff members and lack of resources: “*We go to the*  
426 *facility and talk to the management and the CHWs about their issues. We request for a space*  
427 *for the CHWs, and if there is no space, the space must be created and they must have the*  
428 *space*” (CHW representative, Interview 2, Sedibeng). One of the accusations was that  
429 supervisors neglected the CHWs by not going to the community with them, they are left to  
430 fend for themselves while out in the community. The task team also ordered CHWs who  
431 were assisting facilities with administrative duties to withdraw their services: “*She stopped*  
432 *because the task team told her to stop. They must focus on being the CHWs. They are not*  
433 *receptionists*” (Nurse Mentor, Interview 4, Sedibeng District).

434

435 The district official responsible for the CHW programme called a meeting aimed at resolving  
436 tensions between CHWs and supervisors. At this meeting, the CHW representatives verbally  
437 abused the supervisors in the presence of the district and payroll administration officials:  
438 “*Some of the [supervisors] were literally crying and some didn’t want to talk. They were busy*  
439 *going up and down, going to the bathroom. They were talking outside. I don’t know what they*  
440 *were saying*” (Nurse Mentor, Interview 3, Sedibeng District). Due to the confrontational  
441 approach adopted by the task team, the officials didn’t defend the supervisors or allow the  
442 supervisors to speak for themselves. As a result, the supervisors were left exposed at the  
443 meeting and the militant approach adopted by the task team created greater hostility between  
444 the parties. The nurse mentor reported: “*The task team has more influence than unions or*  
445 *district coordinators because they have control over the CHWs. For example, if they were to*  
446 *call the CHWs today and tell them not to go to work, the CHWs will do exactly that*”.

447

448 To resolve the conflicts, at the suggestion of a nurse mentor employed in two of the facilities  
449 where we collected data, the task team was invited to a meeting to discuss areas of discomfort

450 with supervisors and to work as partners. This engagement enabled the supervisors to be  
451 sensitive to the CHWs' attempts to seek improved conditions of employment. The task team  
452 also changed their approach to dealing with the conflict: "*When there is a concern, the person*  
453 *who complains is called together with the person that they are concerned about. We get*  
454 *together with them in the same room. We listen to the complainant's story at the same time*  
455 *the defendant is present and is also listening and they are able to respond.*" (CHW  
456 representative, Interview 2, Sedibeng District).

457 In 2018, the Gauteng provincial legislature, an oversight body, initiated a meeting of the  
458 CHWs to learn about their challenges in providing community-based care under the national  
459 programme. All CHWs from the province were invited to the meeting, those who attended  
460 expressed their concerns over their yearly contracts, meagre remuneration, lack of working  
461 tools and poor relationships with facility-based staff: "*Mr Motsoaledi [Minister of Health]*  
462 *promised us in November that he is absorbing us. When we were called to Pretoria [National*  
463 *DoH] we thought that we were going to sign contracts as promised but he failed us.*" (CHW,  
464 FGD, Tshwane District Team 2). The CHWs expressed their frustration at the lack of  
465 progress being made by the DoH to provide permanent employment. The legislature  
466 promised to attend to the CHWs grievances and provide feedback.

467

#### 468 Labour unions

469 Though the task team held numerous meetings with district management, they had limited  
470 negotiating powers, as they could not participate in the Department of Health Bargaining  
471 Council (DOHBC). The DOHBC is a formal structure consisting of registered unions, where  
472 workers grievances (e.g., need for improved remuneration) are tabled for consideration by the  
473 employer. The task team needed representation in the DOHBC to escalate their demands. In  
474 2018, the CHWs in Sedibeng joined National, Education, Health and Allied Workers Union

475 (NEHAWU), a registered labour union, to represent them in the DOHBC. The union was  
476 entrusted with negotiating for permanent employment, decent remuneration of the CHWs and  
477 other benefits associated with formal employment (e.g. leave allowance). One of the  
478 representatives of CHWs was also co-opted into the union regional structures. Some CHWs  
479 did not join the union, as the decision appeared rushed, with minimal consultation. Others  
480 were concerned that they would not be able to afford the monthly premiums.

481

#### 482 Outcome of the mobilisations

483 When fieldwork ended, the task team and union had not been able to secure permanent  
484 employment for the CHWs. However, the union had negotiated with the Department of  
485 Health to increase the CHW stipend from R2 500 (136 USD) to R3 500 (192 USD). The  
486 CHWs felt motivated by the increment: *“It has motivated me because since we got the  
487 increase, I have been working harder than before”* (CHW, Interview, Sedibeng District).  
488 Another CHW added with the increment they are able to afford necessities and uniform:  
489 *“Like now, there is a yellow T-shirt costing about R150, we are able to buy and pay for  
490 transport to come to work. On the other side, we buy groceries at home..”* (CHW, Interview,  
491 Sedibeng District).

492

493 Although the CHWs were excited to receive the increment, they still wanted to be absorbed  
494 as permanent workers by the government. The union committed to continue engaging the  
495 Department on this issue and other concerns such as leave allowance.

496

497 On the facility level, the task team recorded some successes, a member of the task team  
498 commented: *“In facility X, the CHWs did not have access to the photocopy machine because  
499 they did not contribute to facility budget to buy paper for photocopy machine... how do you*

500 *expect someone who is being underpaid to have money for such expenses? We fought for*  
501 *them to have access to the printer”* (CHW representative, Interview 2, Sedibeng District).

502

## 503 **DISCUSSION**

504 In the paper, we have reported the CHWs were poorly supervised, resourced and received  
505 meagre remuneration, their employment outsourced, without employment benefits and  
506 protection. The lack of career progression opportunities demotivated the CHWs, particularly  
507 those keen to establish a career in health. In the semi-urban sites, CHWs established a task  
508 team to represent them but refused to join a formal union for fear that union would push  
509 management insufficiently for their demands. The task team held regular meetings and led  
510 protests against clinic, district and provincial management to demand improved conditions of  
511 employment. After the recognition by the local provincial legislature, the task team agreed  
512 joined a labour union (NEHAWU) to order to be able to participate in the local Bargaining  
513 Council. Though they were not successful in getting the government to provide permanent  
514 employment, the union negotiated an increase in stipend from R2 500 to R3 500. In contrast,  
515 in the rural sites, the CHWs were not actively demanding permanent employment due to their  
516 employment contracts being partly managed by NGO managements; they were fearful of  
517 being recalled from the government programme.

518

519 Since the end of data collection, South African CHWs have engaged in further industrial  
520 action. In 2021, NEHAWU took the Department of Health to labour court to declare the 12  
521 months contracts illegal and in contravention of the national labour laws, which state  
522 employment cannot be offered on renewable basis for a period exceeding 3 months [[19](#), [20](#)].  
523 The court arbitrator ruled against the union citing a 2018 agreement signed by government

524 and unions. The agreement refers to government dependence on an external grant to pay  
525 CHW current salaries, such that CHWs permanent employment is unsustainable.

526 During the peak of the COVID pandemic, the Gauteng government did not renew the  
527 contract of the payroll administration company and offered the CHWs employment contracts  
528 similar to other permanently employed government staff members such as nurses [25, 26].  
529 The CHWs monthly salary increased to between R9 000 (495 USD) to R11 000 (605 USD).

530 The COVID-19 pandemic reinforced the need for stable CHW programmes. In many  
531 countries, CHW undertook case identification, participated in screening of people with  
532 COVID-19 symptoms, traced contacts and encouraged vaccine uptake [21-23]. The CHWs  
533 efforts helped stabilise strained healthcare systems, particularly in LMICs. However, poor  
534 access to working tools, supportive supervision and decent remuneration limited their  
535 effectiveness. A multi-country study conducted in Bangladesh, Pakistan, Sierra Leone, Kenya  
536 and Ethiopia showed CHWs were often expected to provide these services without personal  
537 protective equipment (PPE), and were unremunerated for the extra tasks they carried out  
538 during the pandemic [24]. In India, ASHAs assumed roles of providing antenatal care  
539 services because the auxiliary nurses were unavailable [24]. In Brazil, at the height of  
540 COVID-19 infections, CHWs protested when they were expected to provide services while  
541 being underpaid, poorly trained and with no PPE [18]. The Brazilian CHWs used social  
542 media and weekly webinars supported by labour unions to demand safer employment  
543 conditions. They took advantage of the vulnerabilities brought by COVID-19 and exercised  
544 their agency and capacity to take strategic action [18]. This resulted in some municipalities  
545 beginning to purchase PPEs for CHWs undertaking household visits, while some invested in  
546 telemedicine to limit CHWs direct contact with patients. As in Brazil, the pandemic in South  
547 Africa highlighted the important role that CHWs play in reaching the vulnerable; this helped

548 to advance the CHWs efforts for recognition, particularly in the sites where there was prior  
549 mobilisation for improved conditions of employment [25, 26].

550 As highlighted by the study, in many countries CHWs are without union representation to  
551 protect their labour rights [15, 16]. However, following the development of nationwide  
552 programmes in different countries, the shift from being disease-specific to comprehensive  
553 programmes and the COVID-19 pandemic [13, 24], CHWs have begun to demand better  
554 employment conditions [19, 20]. In India, accredited social health activists' (ASHAs) and  
555 anganwadis<sup>2</sup> unions have regularly led marches to demand formal employment with benefits  
556 [17]. So far, the unions have achieved small gains in terms of increased pay and social  
557 security benefits [17].

558 The study had several strengths and limitations. We spent 3 years collecting data in one of the  
559 study sites (Sedibeng district) which allowed us to familiarise ourselves with the history of  
560 the programme and conflicts between the CHWs and the Department of Health in the district.  
561 In the other districts, data collection was limited to three months. Due to our prolonged stay  
562 in the Sedibeng district, familiarity with the CHW programme and labour mobilisation, we  
563 used the site as the main comparator to the other sites. Second, the data collection tools were  
564 written in English, some participants preferred being interviewed in other local languages  
565 (e.g. IsiZulu and Sesotho). To achieve consistency of the translations, as part of pre fieldwork  
566 training, data collectors participated in role-plays to practice posing the same question in the  
567 different languages. This process allowed the data collectors to be comfortable and consistent  
568 in posing the interview questions.

569

570

---

<sup>2</sup> These workers care for the health and wellbeing of women, children and other socioeconomically deprived groups.



571 **CONCLUSION**

572 Consistent mobilisation as demonstrated by the urban-based teams enabled the CHWs to  
573 successfully negotiate salary increments and advance their call for permanent employment.  
574 However, in the rural sites CHWs were less able to join or establish labour representation due  
575 to fear of reprisal from NGOs management. In optimising the motivation and performance of  
576 CHWs, it is important for the government to prioritise full integration of CHWs into the  
577 healthcare system, where they will be afforded their labour rights and support.

578

579 Acknowledgements

580 We would like to thank the following individuals for their invaluable contribution: the data  
581 collectors, key informants, CHWs and their supervisors, health facility staff members and  
582 community representatives. The support of the Sedibeng Health District management, in  
583 particular the former district director Mrs. Salamina Hlahane and community-based services  
584 coordinator Mrs. Bridget Lefhoedi is highly appreciated.

585

586 We would also like to thank these organisations for their generous support: Sedibeng,  
587 Johannesburg, Tshwane and Ehlanzeni Health Districts, and the UK Medical Research  
588 Council (MRC).

589 Abbreviations

590 ASHA: Accredited Social Health Activist

591 CHW: Community Health Worker

592 COSATU: Congress of South African Trade Unions

593 DOHBC: Department of Health Bargaining Council

594 FGD: Focus Group Discussion

595 OTL: Outreach Team Leader

596 PHC: Primary Health Care

597 PPE: Personal Protective Equipment

598 LMIC: Low and Middle-Income Country

599 NEHAWU: National, Education, Health and Allied Workers Union

600 NGO: Non-Government Organisation

601 UHC: Universal Health Coverage

602 WBOT: Ward based Outreach Team

603 WHO: World Health Organisation

604

605 **References**

606 1. Woldie, M., et al., *Community health volunteers could help improve access to and use of*  
607 *essential health services by communities in LMICs: an umbrella review*. Health Policy  
608 Planning, 2018. **33**(10): p. 1128-1143.

609 2. Ballard, M. and P. Montgomery, *Systematic review of interventions for improving the*  
610 *performance of community health workers in low-income and middle-income countries*. BMJ  
611 Open, 2017. **7**(10): p. e014216.

612 3. Kok, M.C., H. Ormel, and J.E.W. Broerse, *Optimising the benefits of community health*  
613 *workers' unique position between communities and the health sector: A comparative analysis*  
614 *of factors shaping relationships in four countries*. 2017. **12**(11): p. 1404-1432.

- 615 4. Gaziano, T.A., et al., *Hypertension education and adherence in South Africa: a cost-*  
616 *effectiveness analysis of community health workers*. BMC Public Health, 2014. **14**: p. 240.
- 617 5. Kok, M.C., et al., *Which intervention design factors influence performance of community*  
618 *health workers in low- and middle-income countries? A systematic review*. Health Policy and  
619 Planning, 2015. **30**(9): p. 1207-27.
- 620 6. Cometto, G., et al., *Health policy and system support to optimise community health worker*  
621 *programmes: an abridged WHO guideline*. The Lancet Global Health, 2018. **6**(12): p. e1397-  
622 e1404.
- 623 7. Pandya, S., et al., *Understanding factors that support community health worker motivation,*  
624 *job satisfaction, and performance in three Ugandan districts: opportunities for strengthening*  
625 *Uganda's community health worker program*. International Journal of Health Policy and  
626 Management, 2022. **11**(12): p. 2886-2894.
- 627 8. Ormel, H., et al., *Salaried and voluntary community health workers: exploring how incentives*  
628 *and expectation gaps influence motivation*. BMC Human Resources for Health, 2019. **17**(1):  
629 p. 59.
- 630 9. Maree, J., *The emergence, struggles and achievements of black trade unions in South Africa*  
631 *from 1973 to 1984*. Labour, Capital and Society/Travail, capital et société, 1985: p. 278-303.
- 632 10. Dibben, P., G. Wood, and K. Mellahi, *Is social movement unionism still relevant? The case of*  
633 *the South African federation COSATU*. Industrial Relations Journal, 2012. **43**(6): p. 494-510.
- 634 11. Masiya, T., *Social movement trade unionism: Case of the congress of South African trade*  
635 *unions*. Politikon, 2014. **41**(3): p. 443-460.
- 636 12. South African Department of Health., *Provincial guidelines for the implementation of the*  
637 *three streams of PHC Re-engineering*. Government Press, 2011.
- 638 13. Schneider, H., et al., *The challenges of reshaping disease specific and care oriented*  
639 *community based services towards comprehensive goals: a situation appraisal in the*  
640 *Western Cape Province, South Africa*. BMC Health Services Research, 2015. **15**: p. 436.

- 641 14. Braun, V. and V. Clarke, *Thematic analysis*. 2012.
- 642 15. van de Ruit, C. and A. Breckenridge, *South African community health workers' pursuit of*  
643 *occupational security*. Gender, Work & Organization, 2022.
- 644 16. Trafford, Z., A. Swartz, and C.J. Colvin, "*Contract to Volunteer*": *South African Community*  
645 *Health Worker Mobilization for Better Labor Protection*. New Solution, 2018. **27**(4): p. 648-  
646 666.
- 647 17. Sinha, D., *India community health workers struggle for recognition*, in *Roar*. 2021.
- 648 18. Lotta, G. and J. Nunes, *COVID-19 and health promotion in Brazil: community health workers*  
649 *between vulnerability and resistance*. Global Health Promotion, 2022. **29**(1): p. 14-22.
- 650 19. Maverick, D., *Community Healthcare Workers demand wage increase and recognition as*  
651 *public servants*. 2019.
- 652 20. Daily Maverick., *Arbitrator rules against Nehawu over bid to make contract workers*  
653 *permanent state employees*. 2021.
- 654 21. Bhaumik, S., et al., *Community health workers for pandemic response: a rapid evidence*  
655 *synthesis*. BMJ Global Health, 2020. **5**(6): p. e002769.
- 656 22. Olateju, Z., et al., *Community health workers experiences and perceptions of working during*  
657 *the COVID-19 pandemic in Lagos, Nigeria—A qualitative study*. Plos one, 2022. **17**(3): p.  
658 e0265092.
- 659 23. Ballard, M., et al., *Prioritising the role of community health workers in the COVID-19*  
660 *response*. BMJ Global Health, 2020. **5**(6): p. e002550.
- 661 24. Salve, S. and J. Raven, *Community health workers and Covid-19: Cross-country evidence on*  
662 *their roles, experiences, challenges and adaptive strategies*. 2023. **3**(1): p. e0001447.
- 663 25. Karibu, *Community Health Workers to sign permanent contracts*. 2020, Karibu Online.
- 664 26. Nicole, L., *Why are community health workers ditching unions?* . 2023, BusinessLive.
- 665
